# Supplementary material
Source: PubMed Central journal article supplement (PMC6751026)
Supplement: NIHMS1007602-supplement-Supp_TableS1.pdf [file NIHMS1007602-supplement-Supp_TableS1.pdf]

Table S1. Electrophysiological properties of glycine evoked currents in nAc.

| Area | Neurons | Glycine sensitive | insensitive | EC <sub>50</sub> (μM) | Current Density (pA/pF) | I <sub>max</sub> (pA) | 10 mM EtOH Potentiation (%) | 100 mM EtOH Potentiation (%) | GTP-γ-S potentiation (%) |
|------|---------|-------------------|-------------|-----------------------|-------------------------|-----------------------|-----------------------------|------------------------------|--------------------------|
| nAc  | WT      | 81 % (42)         | 19 % (10)   | 47 ± 6 (15)           | 7.5 ± 2 (11)            | 314 ± 46 (15)         | 24 ± 9 (8)                  | 56 ± 7 (18)                  | 85 ± 21 (5)              |
|      | KI      | 88 % (57)         | 12 % (8)    | 54 ± 1 (12)           | 7 ± 2 (8)               | 407 ± 110 (12)        | -17 ± 8 (19) (*)            | 1 ± 6 (24) (***)             | 8 ± 19 (9)(*)            |

Values are given as mean ± SEM. Values were fitted to the equation  $I_{\text{glycine}} = I_{\text{max}} [\text{glycine}]^{nH} / ([\text{glycine}]^{nH} + [EC_{50}]^{nH})$  using Origin 8.0 software .

Glycine sensitivity was evaluated with 1000 μM of glycine.

The EC<sub>10</sub> calculated for both genotypes was used for ethanol and GTP-γ-S sensitivity experiments. “% Potentiation” corresponds to the change between the control with glycine EC<sub>10</sub> and presence of 10 and 100 mM ethanol. The “% potentiation at 15 min” corresponds to the change after 15 minutes of dialysis of non-hydrolyzed analog, GTP-γ-S, 200 μM.

\*p<0.05, \*\*\*p<0.001, Unpaired student t test

n=(number of neurons)
