# Supplementary material
Source: PubMed Central journal article supplement (PMC6751026)
Supplement: NIHMS1007602-supplement-Supp_TableS2.pdf [file NIHMS1007602-supplement-Supp_TableS2.pdf]

Table S2. Electrophysiological properties of APs in nAc.

|                                 | WT               |                  |                  |                   | KI                |                   |                 |                  |
|---------------------------------|------------------|------------------|------------------|-------------------|-------------------|-------------------|-----------------|------------------|
|                                 | Control          | EtOH             | EtOH+STN         | STN               | Control           | EtOH              | EtOH+STN        | STN              |
| <b>RMP (mV)</b>                 | -67.2 ± 0.8 (21) | -65.7 ± 1.4 (16) | -65.2 ± 1.3 (10) | -68.1 ± 0.9 (17)  | -66.5 ± 1.9 (12)  | -64.0 ± 2.5 (12)  | -68.6 ± 1.8 (6) | -67.8 ± 2.0 (10) |
| <b>Threshold Potential (mV)</b> | -28.7 ± 1.4 (21) | -24.1 ± 2 (16)   | -25.8 ± 3.4 (10) | -24.6 ± 1.2 (17)* | -29.8 ± 2.4 (12)  | -28.1 ± 2.6 (12)  | -31.9 ± 3.0 (6) | -26.6 ± 2.5 (10) |
| <b>AP Half-Width (ms)</b>       | 1.35 ± 0.06 (21) | 1.49 ± 0.12 (16) | 1.52 ± 0.20 (10) | 1.52 ± 0.08 (17)  | 1.27 ± 0.07 (12)  | 1.49 ± 0.11 (12)  | 1.16 ± 0.06 (6) | 1.36 ± 0.08 (10) |
| <b>Input Resistance (MΩ)</b>    | 160.8 ± 11 (21)  | 150.7 ± 12 (16)  | 139.7 ± 17 (10)  | 156.2 ± 10 (17)   | 176.4 ± 29.6 (12) | 205.2 ± 41.7 (12) | 90.9 ± 5.5 (6)  | 164.1 ± 34 (10)  |
| <b>Peak Amplitude (mV)</b>      | 113.6 ± 2.4 (21) | 113.5 ± 3 (16)   | 112.1 ± 3.2 (10) | 113.7 ± 3 (17)    | 121.5 ± 2.2 (12)  | 119.8 ± 2.6 (12)  | 118.8 ± 3.1 (6) | 122.2 ± 3.0 (10) |

Values are given as mean ± SEM. \*p<0.05, Unpaired student t test  
RMP=Resting membrane potential  
n=(number of neurons)
