# Supplementary material
Source: PubMed Central journal article supplement (PMC6751026)

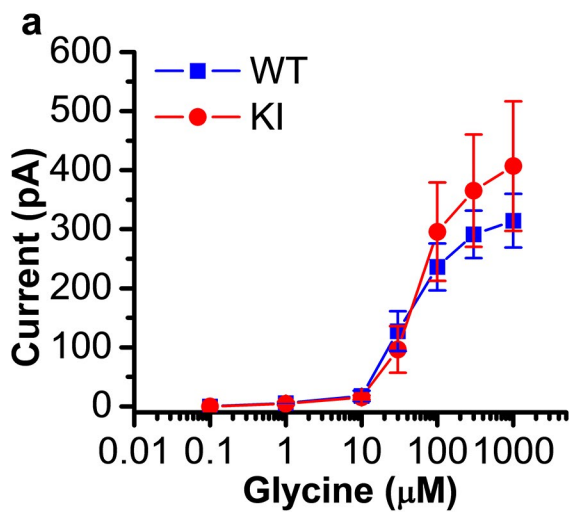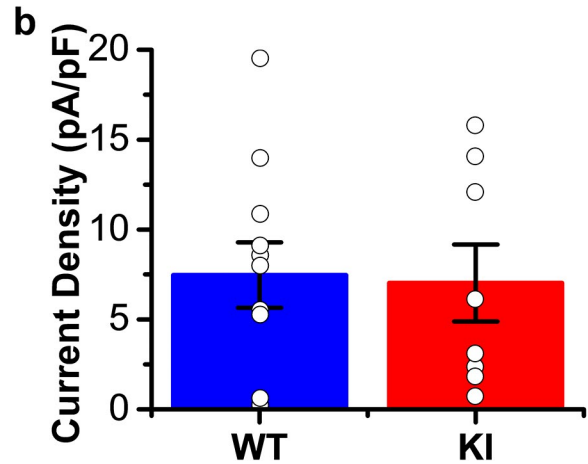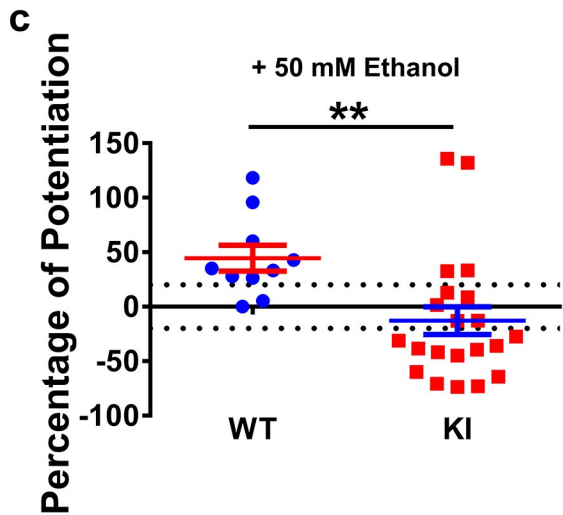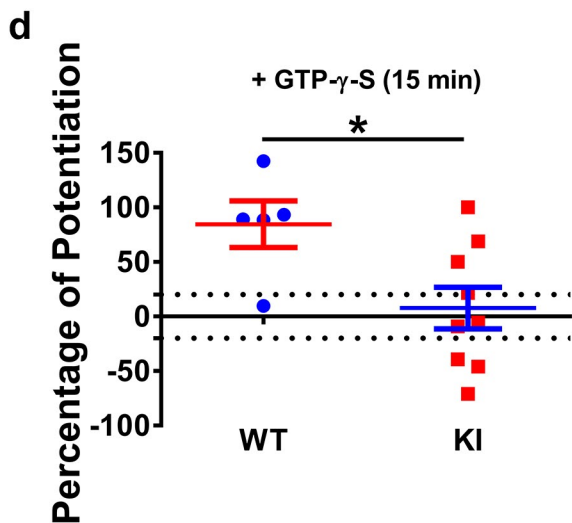

Supplement: NIHMS1007602-supplement-Supp_FigS1.pdf [file NIHMS1007602-supplement-Supp_FigS1.pdf]

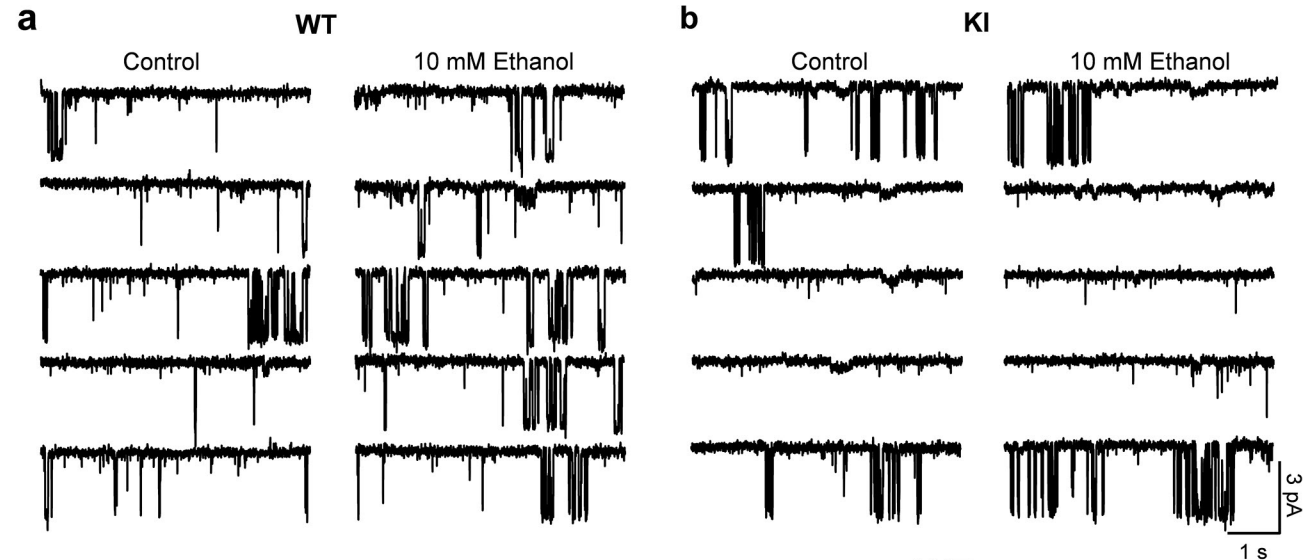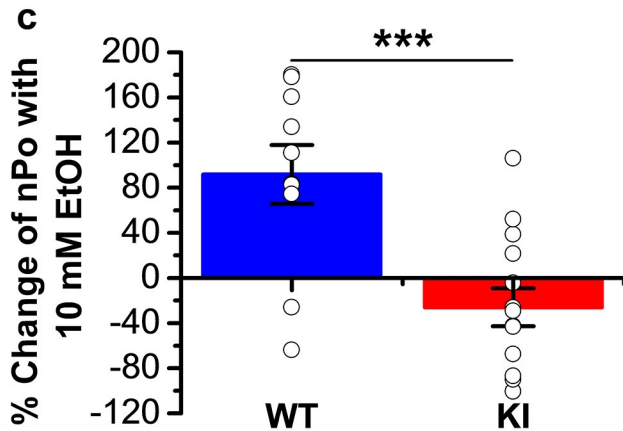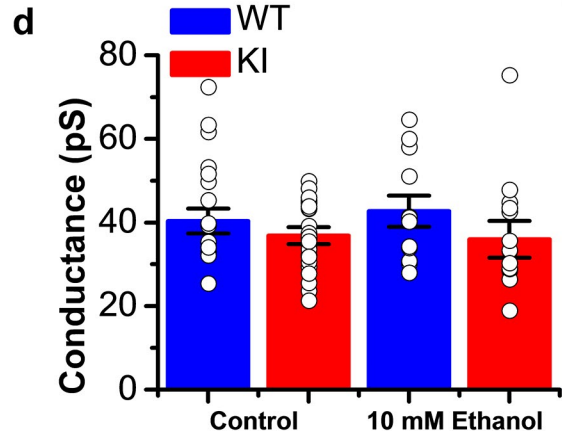

Supplement: NIHMS1007602-supplement-Supp_FigS2.pdf [file NIHMS1007602-supplement-Supp_FigS2.pdf]

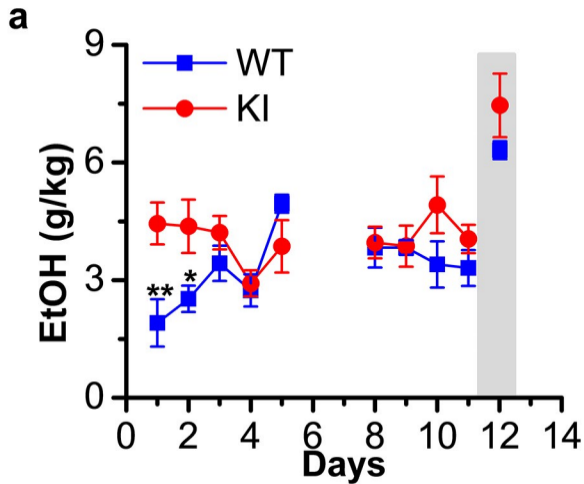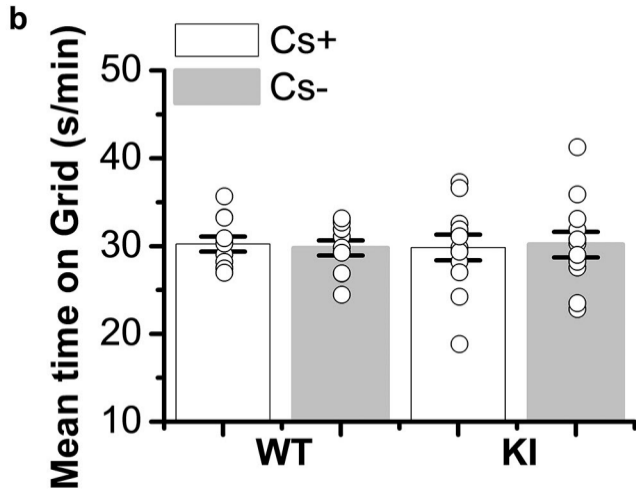

Supplement: NIHMS1007602-supplement-Supp_FigS3.pdf [file NIHMS1007602-supplement-Supp_FigS3.pdf]
